# Supplementary material for: Impact of coxsackievirus-B4E2 combined with a single low dose of streptozotocin on pancreas of outbred mice: investigation of viral load, pathology and inflammation
Source: PubMed Central journal article supplement (PMC6626040; doi:10.1038/s41598-019-46227-3), 2019-07-12
Supplement: 41598_2019_46227_MOESM1_ESM.pdf [file 41598_2019_46227_MOESM1_ESM.pdf]

**Impact of coxsackievirus-B4E2 combined with a single low dose of streptozotocin on pancreas of outbred mice: investigation of viral load, pathology and inflammation**

Mehdi A. Benkahla<sup>a</sup>, Famara Sane<sup>a</sup>, Antoine Bertin<sup>a</sup>, Anais-Camille Vreulx<sup>a</sup>, Firas Elmastour<sup>a</sup>, Hela Jaidane<sup>b,c</sup>, Rachel Desailoud<sup>d</sup>, Didier Hober<sup>a</sup>

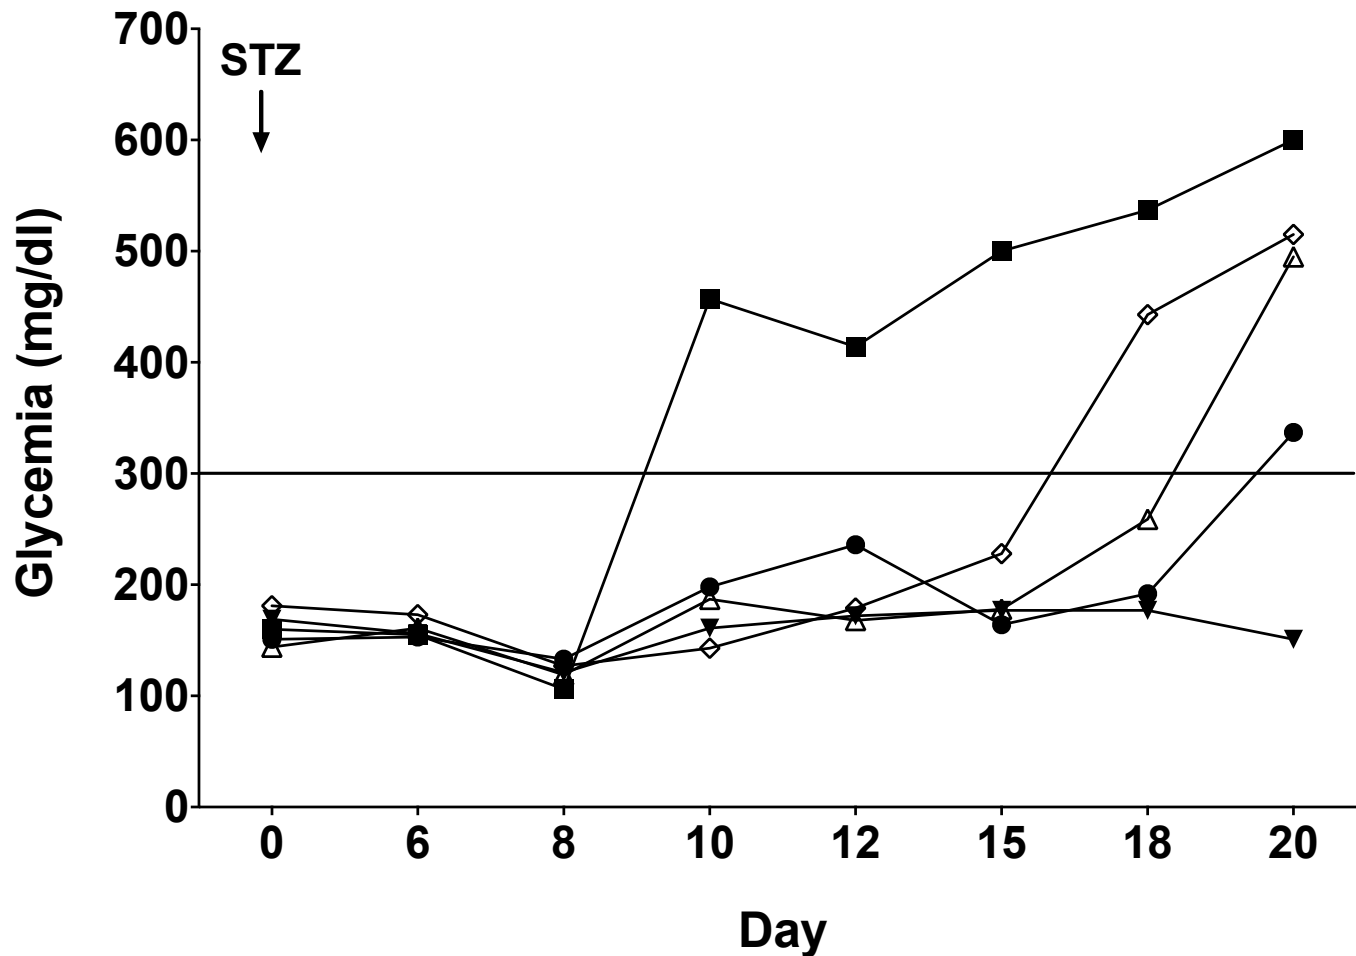

**Supplementary figure S1 : Streptozotocin-induced hyperglycemia in CD1 mice.** CD1 mice were inoculated with 45 mg of STZ/Kg intraperitoneally. Each mouse is represented by a symbol (n=5). Blood was collected from tail vein until day 20 post-infection. The blood glucose level was measured using a glucometer. The results are expressed as mg/dl. 300 mg/dl is the threshold for hyperglycemia
